# Supplementary material for: Lymphotoxin β receptor-mediated NFκB signaling promotes glial lineage differentiation and inhibits neuronal lineage differentiation in mouse brain neural stem/progenitor cells
Source: Springer Nature journal article supplement (doi:10.1186/s12974-018-1074-z), 2018-02-20

Fig. Sup1

**a** WT: DCX/GFAP/DAPI

**b** TG: DCX/GFAP/DAPI

Day 1

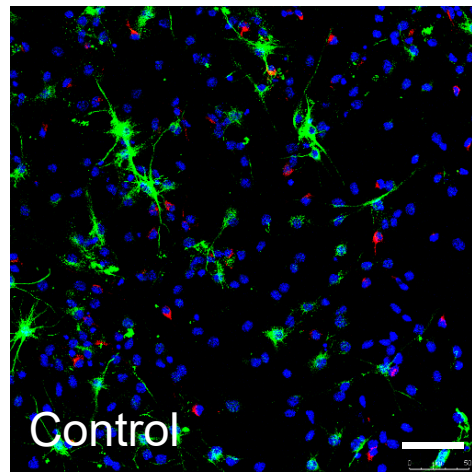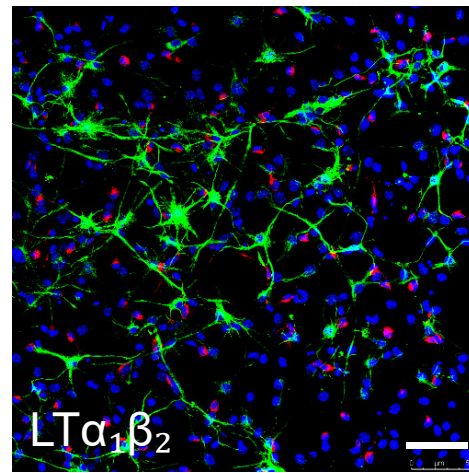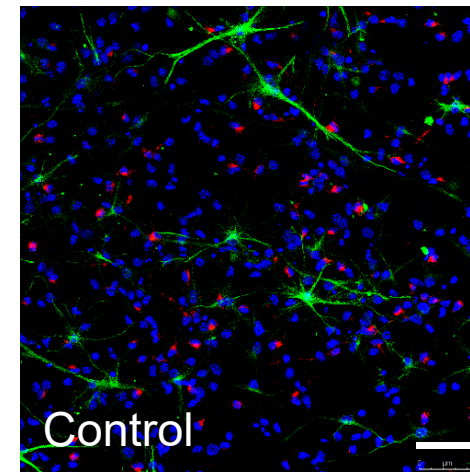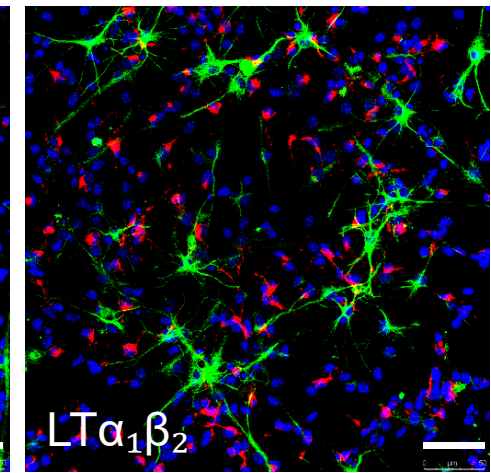

Day 3

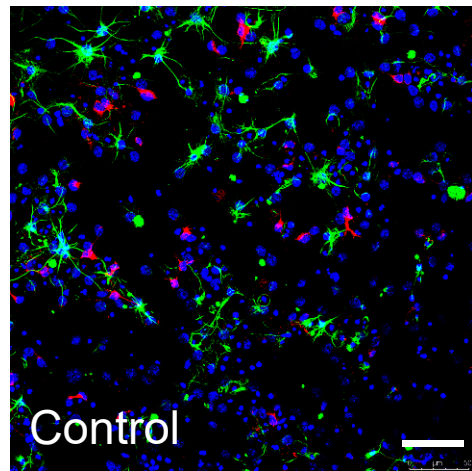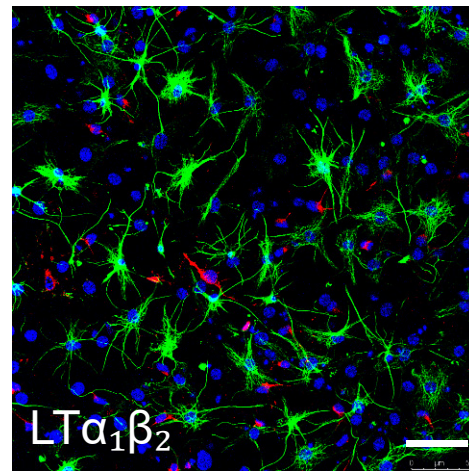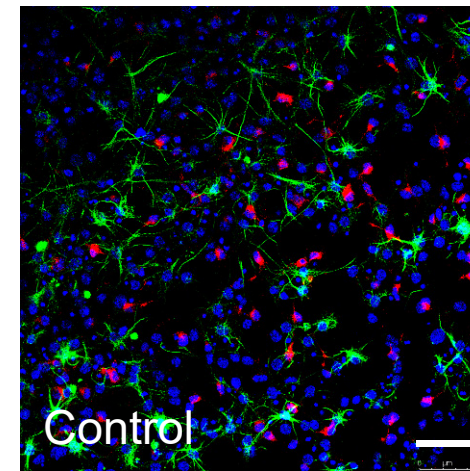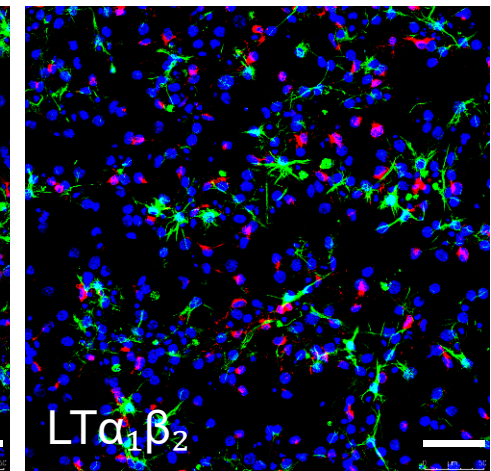

Day 6

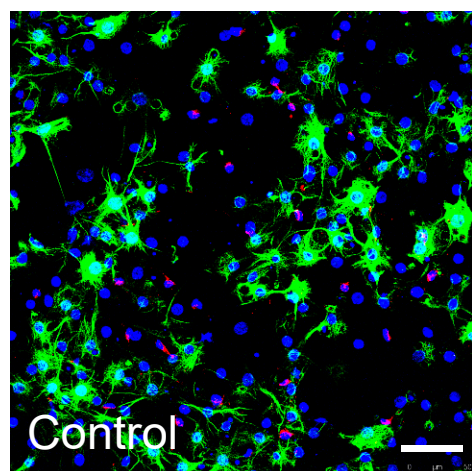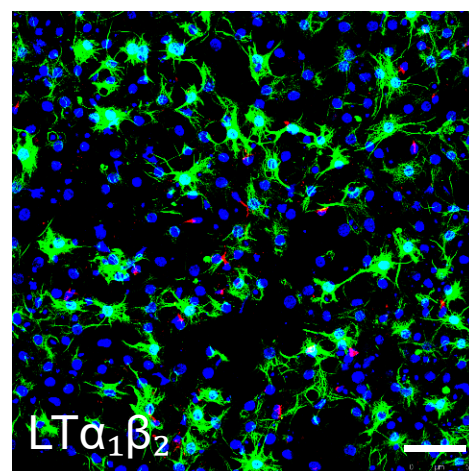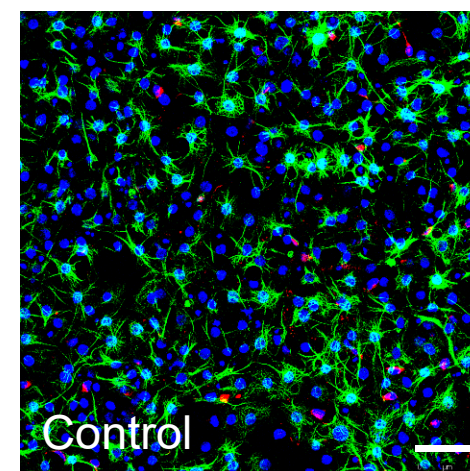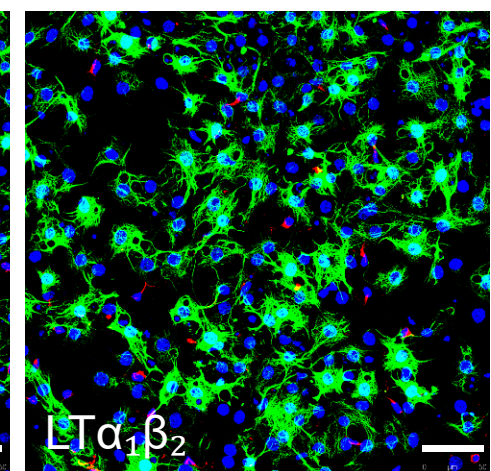

Fig. Sup 2

**a** **Tuj1/MBP/DAPI**

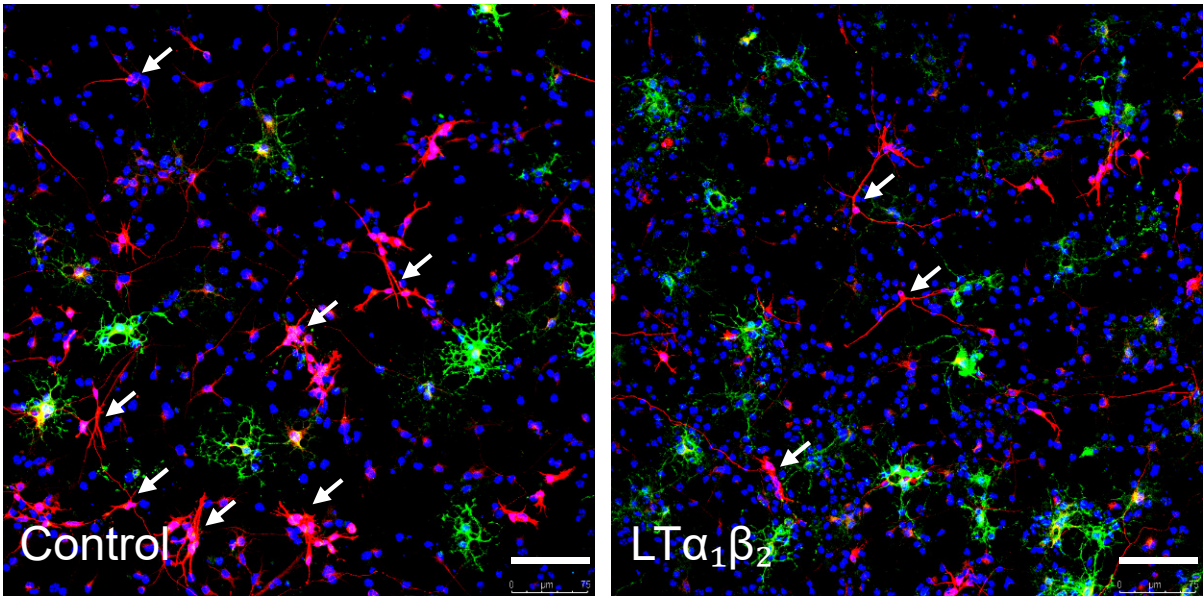

**b** **GFAP/DCX/DAPI**

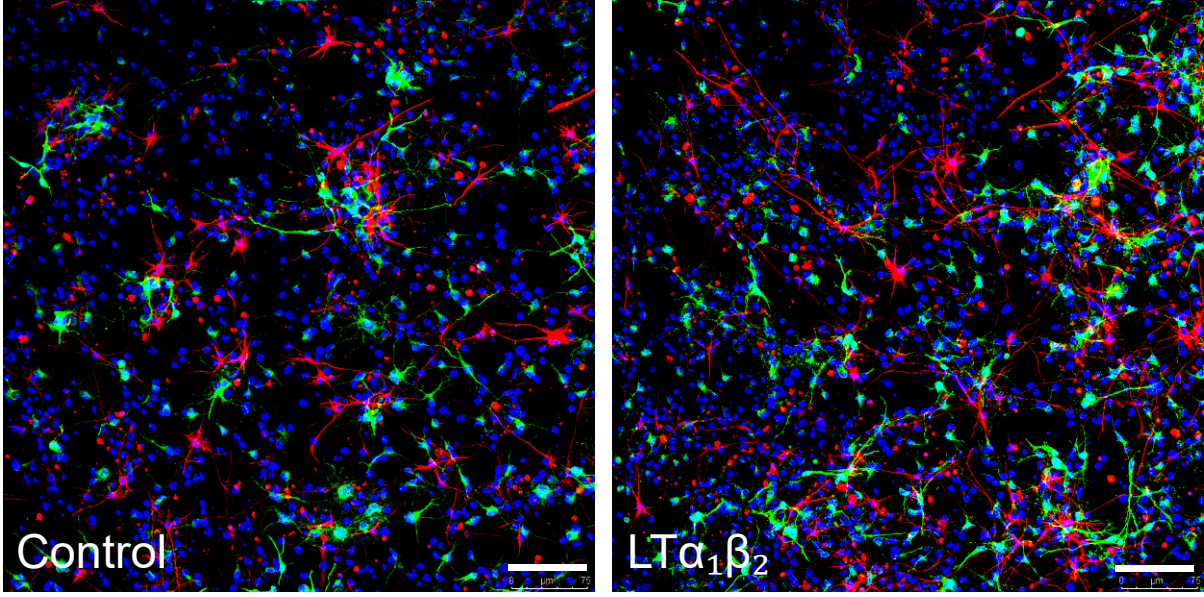

**c**

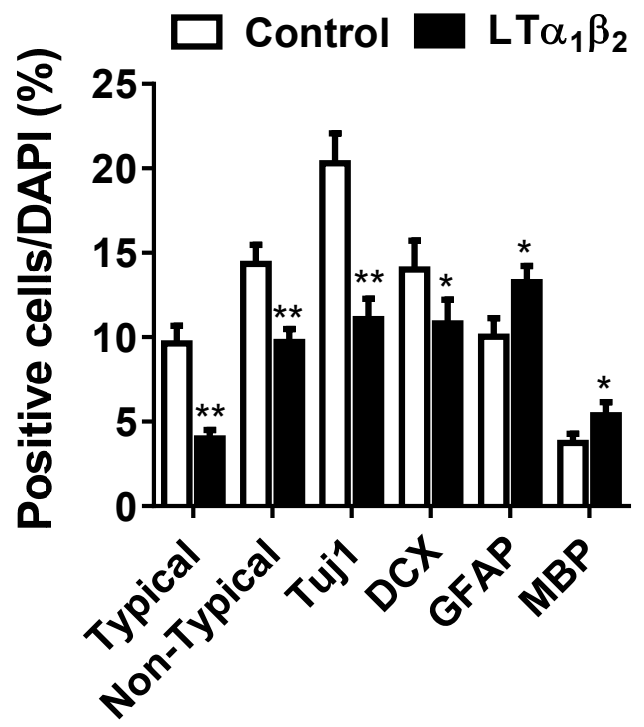

Fig. Sup 3

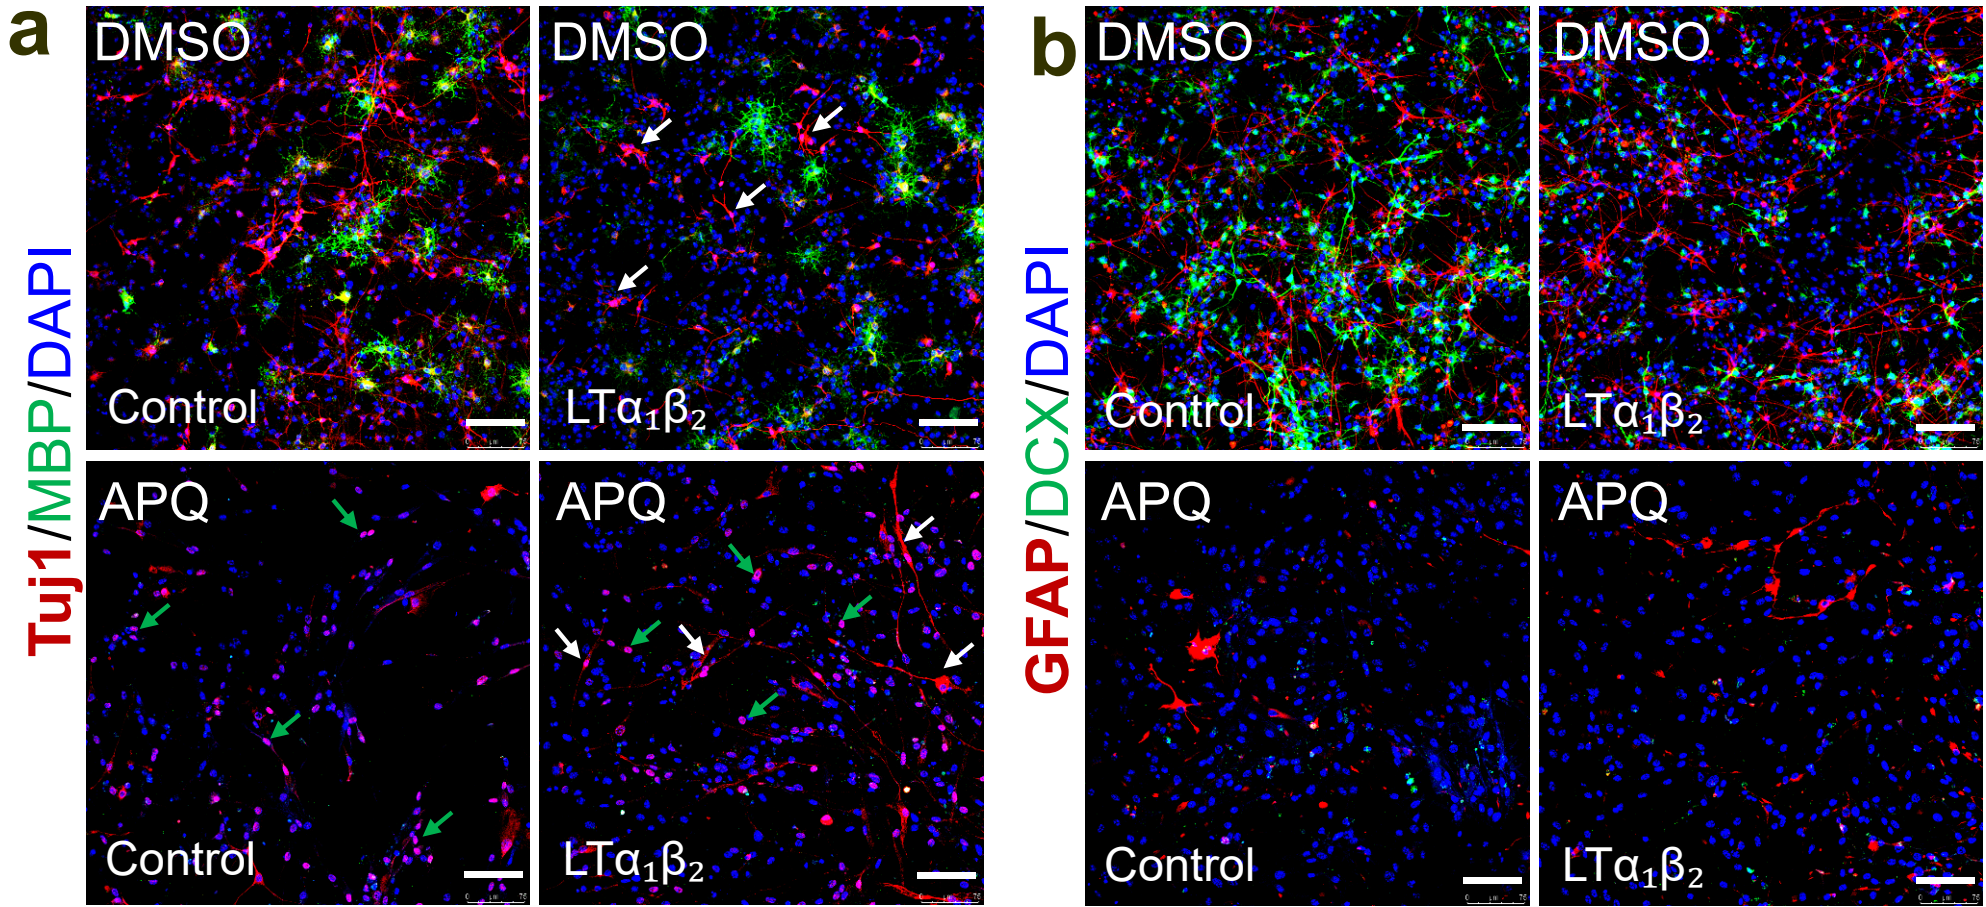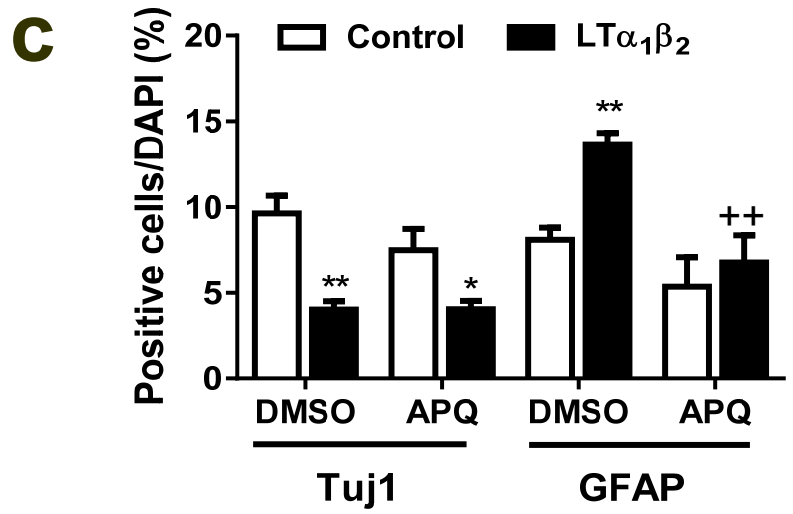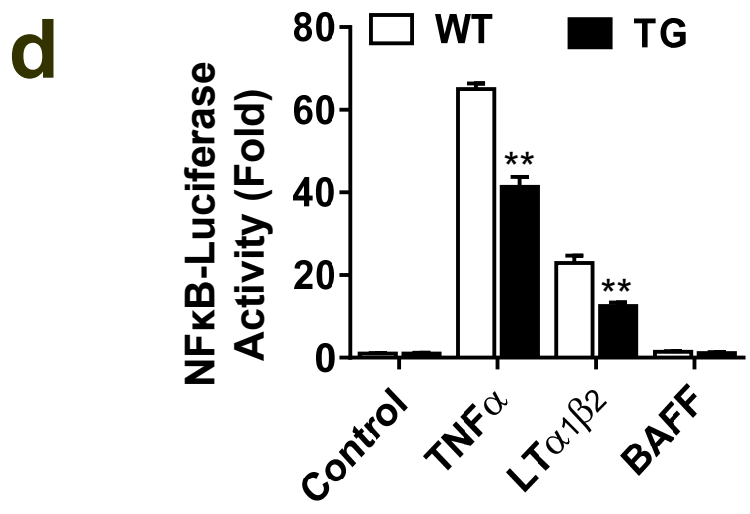

Supplement: MOESM1 [file 15478224]
